# Supplementary material for: Five major shifts of diversification through the long evolutionary history of Magnoliidae (angiosperms)
Source: PubMed Central journal article supplement (PMC4377182; doi:10.1186/s12862-015-0320-6), 2015-03-18
Supplement: 12862_2015_320_MOESM1_ESM.pdf [file 12862_2015_320_MOESM1_ESM.pdf]

## Additional file 1. Information about BEAST analyses.

### Angio 130

| Run | Burnin in million generations | Frequency used to summarize results from tree files in number of generations |
|-----|-------------------------------|------------------------------------------------------------------------------|
| 1   | 20                            | 10,000                                                                       |
| 2   | 20                            |                                                                              |
| 3   | 30                            |                                                                              |
| 4   | 20                            |                                                                              |

#### Statistic of the combined four runs

|                              | Mean      | ESS       |
|------------------------------|-----------|-----------|
| posterior                    | -174300   | 257.113   |
| prior                        | -2782.104 | 94.536    |
| likelihood                   | -171500   | 5229.41   |
| treeModel.rootHeight         | 130.004   | 4857.401  |
| tmrca(All)                   | 130.004   | 4857.401  |
| tmrca(Caly_Chimo)            | 90.215    | 302.935   |
| tmrca(Canellales)            | 125.998   | 4185.694  |
| tmrca(core_Lurales)          | 111.034   | 533.718   |
| tmrca(Lurales)               | 117.38    | 177.99    |
| tmrca(Saur_Gymno)            | 50.883    | 370.21    |
| tmrca(eudicots)              | 98.925    | 89.127    |
| tmrca(root)                  | 129.909   | 2334.086  |
| tmrca(Magnoliinae)           | 114.765   | 306.681   |
| birthDeath.meanGrowthRate    | 0.02897   | 467.895   |
| birthDeath.relativeDeathRate | 0.37      | 2530.773  |
| birthDeath.sampleProbability | 0.554     | 780.924   |
| 18s.ac                       | 0.186     | 14482.993 |
| 18s.ag                       | 0.346     | 8928.639  |
| 18s.at                       | 0.213     | 15496.73  |
| 18s.cg                       | 0.104     | 14130.476 |
| 18s.gt                       | 0.141     | 14770.279 |
| 18s.frequencies1             | 0.242     | 9620.275  |
| 18s.frequencies2             | 0.232     | 10070.495 |
| 18s.frequencies3             | 0.267     | 10101.218 |
| 18s.frequencies4             | 0.259     | 9176.812  |
| 18s.alpha                    | 0.325     | 10463.249 |
| 18s.plnv                     | 0.484     | 10045.543 |
| 26s.ac                       | 0.09252   | 10485.793 |
| 26s.ag                       | 0.385     | 6037.644  |
| 26s.at                       | 0.186     | 13868.77  |
| 26s.cg                       | 0.05935   | 12166.208 |
| 26s.gt                       | 0.127     | 16490.447 |
| 26s.frequencies1             | 0.263     | 6324.192  |
| 26s.frequencies2             | 0.236     | 8272.734  |
| 26s.frequencies3             | 0.309     | 8451.109  |

|                   |         |           |
|-------------------|---------|-----------|
| 26s.frequencies4  | 0.192   | 6077.299  |
| 26s.alpha         | 0.601   | 5272.898  |
| 26s.plnv          | 0.215   | 5229.054  |
| atp1.ac           | 0.761   | 11982.543 |
| atp1.ag           | 0.818   | 7595.59   |
| atp1.at           | 0.779   | 10527.547 |
| atp1.cg           | 0.301   | 13747.138 |
| atp1.gt           | 0.389   | 10529.382 |
| atp1.frequencies1 | 0.28    | 8820.197  |
| atp1.frequencies2 | 0.206   | 10259.053 |
| atp1.frequencies3 | 0.243   | 10814.179 |
| atp1.frequencies4 | 0.27    | 10290.169 |
| atp1.alpha        | 0.293   | 6873.677  |
| atp1.plnv         | 0.415   | 7217.586  |
| atpb.ac           | 0.233   | 13900.691 |
| atpb.ag           | 0.795   | 8904.992  |
| atpb.at           | 0.07539 | 16490.457 |
| atpb.cg           | 0.147   | 19852.628 |
| atpb.gt           | 0.122   | 15632.692 |
| atpb.frequencies1 | 0.292   | 8688.414  |
| atpb.frequencies2 | 0.203   | 9775.191  |
| atpb.frequencies3 | 0.235   | 9714.637  |
| atpb.frequencies4 | 0.27    | 10018.052 |
| atpb.alpha        | 0.502   | 4565.687  |
| atpb.plnv         | 0.308   | 4638.021  |
| matk.ac           | 0.454   | 4990.18   |
| matk.ag           | 1.048   | 3448.828  |
| matk.at           | 0.06806 | 9566.318  |
| matk.cg           | 0.306   | 7465.344  |
| matk.gt           | 0.308   | 7168.904  |
| matk.frequencies1 | 0.29    | 3833.406  |
| matk.frequencies2 | 0.151   | 6634.114  |
| matk.frequencies3 | 0.153   | 5112.047  |
| matk.frequencies4 | 0.406   | 3420.699  |
| matk.alpha        | 1.153   | 9474.688  |
| matk.plnv         | 0.137   | 8939.23   |
| matr.ac           | 0.96    | 9138.396  |
| matr.ag           | 0.63    | 6834.057  |
| matr.at           | 0.724   | 10829.659 |
| matr.cg           | 0.249   | 10356.765 |
| matr.gt           | 0.84    | 9006.445  |
| matr.frequencies1 | 0.263   | 9951.457  |
| matr.frequencies2 | 0.266   | 10389.067 |
| matr.frequencies3 | 0.254   | 10418.168 |
| matr.frequencies4 | 0.217   | 9177.335  |
| matr.alpha        | 0.355   | 8620.931  |
| matr.plnv         | 0.0963  | 9451.468  |
| mtlsu.ac          | 1.246   | 9261.767  |
| mtlsu.ag          | 0.624   | 6784.51   |
| mtlsu.at          | 0.862   | 8778.783  |

|                       |         |           |
|-----------------------|---------|-----------|
| mtlsu.cg              | 0.475   | 9666.286  |
| mtlsu.gt              | 1.039   | 8460.06   |
| mtlsu.frequencies1    | 0.259   | 11239.304 |
| mtlsu.frequencies2    | 0.232   | 10677.283 |
| mtlsu.frequencies3    | 0.284   | 10476.503 |
| mtlsu.frequencies4    | 0.225   | 10889.666 |
| mtlsu.alpha           | 0.291   | 17112.972 |
| mtlsu.plnv            | 0.465   | 17954.386 |
| mtssu.ac              | 0.798   | 8175.174  |
| mtssu.ag              | 0.437   | 6170.214  |
| mtssu.at              | 0.63    | 8933.795  |
| mtssu.cg              | 0.291   | 10343.336 |
| mtssu.gt              | 0.881   | 8903.737  |
| mtssu.frequencies1    | 0.252   | 10802.461 |
| mtssu.frequencies2    | 0.232   | 10405.572 |
| mtssu.frequencies3    | 0.308   | 10384.931 |
| mtssu.frequencies4    | 0.207   | 9824.417  |
| mtssu.alpha           | 0.292   | 12119.301 |
| mtssu.plnv            | 0.42    | 12307.476 |
| ndhf.ac               | 0.366   | 6419.006  |
| ndhf.ag               | 1.225   | 3228.123  |
| ndhf.at               | 0.09258 | 8218.063  |
| ndhf.cg               | 0.433   | 8318.368  |
| ndhf.gt               | 0.27    | 6013.169  |
| ndhf.frequencies1     | 0.301   | 4168.022  |
| ndhf.frequencies2     | 0.152   | 4973.539  |
| ndhf.frequencies3     | 0.143   | 4610.634  |
| ndhf.frequencies4     | 0.404   | 3851.226  |
| ndhf.alpha            | 0.831   | 5951.163  |
| ndhf.plnv             | 0.331   | 5971.007  |
| rbcl.ac               | 0.362   | 7477.277  |
| rbcl.ag               | 0.799   | 4030.238  |
| rbcl.at               | 0.124   | 7166.501  |
| rbcl.cg               | 0.27    | 9137.621  |
| rbcl.gt               | 0.212   | 6277.846  |
| rbcl.frequencies1     | 0.28    | 5627.507  |
| rbcl.frequencies2     | 0.182   | 4752.235  |
| rbcl.frequencies3     | 0.235   | 5893.579  |
| rbcl.frequencies4     | 0.302   | 6208.969  |
| rbcl.alpha            | 0.609   | 13726.135 |
| rbcl.plnv             | 0.442   | 13448.942 |
| trnlfspr.ac           | 0.46    | 3159.224  |
| trnlfspr.ag           | 0.851   | 2175.532  |
| trnlfspr.at           | 0.196   | 3924.115  |
| trnlfspr.cg           | 0.364   | 5145.905  |
| trnlfspr.gt           | 0.369   | 5098.541  |
| trnlfspr.frequencies1 | 0.328   | 2609.098  |
| trnlfspr.frequencies2 | 0.162   | 4142.016  |
| trnlfspr.frequencies3 | 0.169   | 4378.165  |
| trnlfspr.frequencies4 | 0.341   | 2563.793  |

|                         |            |           |
|-------------------------|------------|-----------|
| trnlfspr.alpha          | 0.878      | 18361.011 |
| trnli.ac                | 0.374      | 7291.74   |
| trnli.ag                | 0.774      | 4388.265  |
| trnli.at                | 0.14       | 9388.919  |
| trnli.cg                | 0.307      | 10072.921 |
| trnli.gt                | 0.467      | 7167.096  |
| trnli.frequencies1      | 0.404      | 4917.58   |
| trnli.frequencies2      | 0.146      | 6363.745  |
| trnli.frequencies3      | 0.177      | 6098.677  |
| trnli.frequencies4      | 0.272      | 5198.855  |
| trnli.alpha             | 1.91       | 15444.299 |
| trnli.plnv              | 0.206      | 16454.651 |
| uclid.mean              | 0.0007218  | 109.823   |
| uclid.stdev             | 1.1        | 166.855   |
| meanRate                | 0.0004935  | 98.86     |
| coefficientOfVariation  | 1.847      | 171.794   |
| covariance              | 0.373      | 208.732   |
| 18s.treeLikelihood      | -9412.229  | 9712.086  |
| 26s.treeLikelihood      | -24135.457 | 6962.896  |
| atp1.treeLikelihood     | -6078.395  | 6705.179  |
| atpb.treeLikelihood     | -11797.842 | 6241.554  |
| matk.treeLikelihood     | -19840.387 | 1862.214  |
| matr.treeLikelihood     | -9752.98   | 9321.083  |
| mtlsu.treeLikelihood    | -11105.888 | 10964.323 |
| mtssu.treeLikelihood    | -7532.841  | 6037.265  |
| ndhf.treeLikelihood     | -32005.451 | 7228.671  |
| rbcl.treeLikelihood     | -18832.332 | 468.293   |
| trnlfspr.treeLikelihood | -12387.86  | 996.978   |
| trnli.treeLikelihood    | -8590.177  | 971.976   |
| speciation              | -1011.668  | 92.823    |

---

## Angio 140

| Run                                        | Burnin in million generations | Frequency used to summarize results from tree files in number of generations |
|--------------------------------------------|-------------------------------|------------------------------------------------------------------------------|
| 1                                          | 10                            | 15,000                                                                       |
| 2                                          | 10                            |                                                                              |
| 3                                          | 10                            |                                                                              |
| 4                                          | 10                            |                                                                              |
| <b>Statistic of the combined four runs</b> |                               |                                                                              |
|                                            | <b>Mean</b>                   | <b>ESS</b>                                                                   |
| posterior                                  | -174300                       | 583                                                                          |
| prior                                      | -2796.208                     | 141.663                                                                      |
| likelihood                                 | -171500                       | 1553.539                                                                     |
| treeModel.rootHeight                       | 139.696                       | 3059.052                                                                     |
| tmrca(All)                                 | 139.696                       | 3059.052                                                                     |
| tmrca(Caly_Chimo)                          | 89.122                        | 582.891                                                                      |
| tmrca(Canellales)                          | 126.377                       | 1525.936                                                                     |

|                              |         |           |
|------------------------------|---------|-----------|
| tmrca(core_Laurales)         | 110.959 | 952.553   |
| tmrca(Laurales)              | 118.45  | 231.41    |
| tmrca(Saur_Gymno)            | 51.467  | 554.004   |
| tmrca(eudicots)              | 102.684 | 160.112   |
| tmrca(root)                  | 139.298 | 1534.184  |
| tmrca(Magnoliinae)           | 115.027 | 730.264   |
| birthDeath.meanGrowthRate    | 0.02827 | 866.078   |
| birthDeath.relativeDeathRate | 0.351   | 5633.284  |
| birthDeath.sampleProbability | 0.525   | 1228.168  |
| 18s.ac                       | 0.186   | 17994.01  |
| 18s.ag                       | 0.346   | 11169.648 |
| 18s.at                       | 0.213   | 17787.622 |
| 18s.cg                       | 0.104   | 17745.457 |
| 18s.gt                       | 0.14    | 18158.875 |
| 18s.frequencies1             | 0.242   | 10968.229 |
| 18s.frequencies2             | 0.232   | 11913.97  |
| 18s.frequencies3             | 0.267   | 11880.435 |
| 18s.frequencies4             | 0.26    | 10914.187 |
| 18s.alpha                    | 0.325   | 12974.625 |
| 18s.plnv                     | 0.484   | 12359.253 |
| 26s.ac                       | 0.09265 | 12384.905 |
| 26s.ag                       | 0.385   | 6088.685  |
| 26s.at                       | 0.186   | 14492.506 |
| 26s.cg                       | 0.05938 | 13045.874 |
| 26s.gt                       | 0.126   | 19748.612 |
| 26s.frequencies1             | 0.263   | 7349.816  |
| 26s.frequencies2             | 0.236   | 8755.217  |
| 26s.frequencies3             | 0.309   | 10427.737 |
| 26s.frequencies4             | 0.192   | 6633.56   |
| 26s.alpha                    | 0.602   | 6939.759  |
| 26s.plnv                     | 0.216   | 6773.076  |
| atp1.ac                      | 0.759   | 14229.626 |
| atp1.ag                      | 0.814   | 8979.292  |
| atp1.at                      | 0.776   | 12709.919 |
| atp1.cg                      | 0.3     | 16040.39  |
| atp1.gt                      | 0.387   | 11967.494 |
| atp1.frequencies1            | 0.28    | 11012.798 |
| atp1.frequencies2            | 0.206   | 12435.948 |
| atp1.frequencies3            | 0.243   | 12716.644 |
| atp1.frequencies4            | 0.27    | 11672.399 |
| atp1.alpha                   | 0.293   | 8734.171  |
| atp1.plnv                    | 0.415   | 8443.193  |
| atpb.ac                      | 0.233   | 14830.1   |
| atpb.ag                      | 0.796   | 9647.35   |
| atpb.at                      | 0.07535 | 21066.139 |
| atpb.cg                      | 0.148   | 22171.179 |
| atpb.gt                      | 0.122   | 19367.62  |
| atpb.frequencies1            | 0.293   | 10597.006 |
| atpb.frequencies2            | 0.202   | 11600.661 |
| atpb.frequencies3            | 0.235   | 11378.865 |

|                    |         |           |
|--------------------|---------|-----------|
| atpb.frequencies4  | 0.27    | 10691.856 |
| atpb.alpha         | 0.506   | 5112.562  |
| atpb.plnv          | 0.31    | 5060.469  |
| matk.ac            | 0.455   | 6339.678  |
| matk.ag            | 1.051   | 4492.098  |
| matk.at            | 0.06819 | 11774.317 |
| matk.cg            | 0.307   | 9689.776  |
| matk.gt            | 0.309   | 8691.134  |
| matk.frequencies1  | 0.29    | 4829.837  |
| matk.frequencies2  | 0.151   | 7620.338  |
| matk.frequencies3  | 0.153   | 6282.893  |
| matk.frequencies4  | 0.406   | 4617.881  |
| matk.alpha         | 1.148   | 10327.379 |
| matk.plnv          | 0.135   | 10653.845 |
| matr.ac            | 0.957   | 10365.761 |
| matr.ag            | 0.627   | 8383.35   |
| matr.at            | 0.722   | 12866.265 |
| matr.cg            | 0.248   | 12800.082 |
| matr.gt            | 0.837   | 11247.167 |
| matr.frequencies1  | 0.263   | 10802.139 |
| matr.frequencies2  | 0.266   | 11955.2   |
| matr.frequencies3  | 0.254   | 12042.599 |
| matr.frequencies4  | 0.217   | 11274.521 |
| matr.alpha         | 0.354   | 12614.105 |
| matr.plnv          | 0.09525 | 11801.249 |
| mtlsu.ac           | 1.247   | 12205.828 |
| mtlsu.ag           | 0.623   | 8690.11   |
| mtlsu.at           | 0.861   | 12145.502 |
| mtlsu.cg           | 0.475   | 11719.324 |
| mtlsu.gt           | 1.037   | 10058.615 |
| mtlsu.frequencies1 | 0.259   | 13149.532 |
| mtlsu.frequencies2 | 0.232   | 12865.207 |
| mtlsu.frequencies3 | 0.284   | 12123.031 |
| mtlsu.frequencies4 | 0.225   | 13316.919 |
| mtlsu.alpha        | 0.291   | 22709.683 |
| mtlsu.plnv         | 0.465   | 24381.669 |
| mtssu.ac           | 0.798   | 10155.545 |
| mtssu.ag           | 0.438   | 7992.721  |
| mtssu.at           | 0.629   | 10282.256 |
| mtssu.cg           | 0.291   | 12815.774 |
| mtssu.gt           | 0.883   | 10026.358 |
| mtssu.frequencies1 | 0.252   | 12670.605 |
| mtssu.frequencies2 | 0.232   | 12747.647 |
| mtssu.frequencies3 | 0.308   | 12954.708 |
| mtssu.frequencies4 | 0.208   | 12316.354 |
| mtssu.alpha        | 0.292   | 15552.801 |
| mtssu.plnv         | 0.42    | 16028.209 |
| ndhf.ac            | 0.366   | 8699.309  |
| ndhf.ag            | 1.225   | 4457.707  |
| ndhf.at            | 0.09255 | 10076.403 |

|                        |            |           |
|------------------------|------------|-----------|
| ndhf.cg                | 0.433      | 10813.954 |
| ndhf.gt                | 0.27       | 8539.855  |
| ndhf.frequencies1      | 0.301      | 5375.134  |
| ndhf.frequencies2      | 0.152      | 6571.797  |
| ndhf.frequencies3      | 0.143      | 6129.975  |
| ndhf.frequencies4      | 0.404      | 5024.068  |
| ndhf.alpha             | 0.831      | 6899.146  |
| ndhf.pInv              | 0.331      | 6695.725  |
| rbcl.ac                | 0.363      | 9777.348  |
| rbcl.ag                | 0.794      | 4553.653  |
| rbcl.at                | 0.124      | 3663.926  |
| rbcl.cg                | 0.269      | 8867.217  |
| rbcl.gt                | 0.21       | 7112.924  |
| rbcl.frequencies1      | 0.279      | 4399.109  |
| rbcl.frequencies2      | 0.182      | 6132.125  |
| rbcl.frequencies3      | 0.236      | 4009.724  |
| rbcl.frequencies4      | 0.302      | 7018.436  |
| rbcl.alpha             | 0.61       | 16760.607 |
| rbcl.pInv              | 0.442      | 16007.945 |
| trnlfspr.ac            | 0.456      | 4581.736  |
| trnlfspr.ag            | 0.844      | 3137.789  |
| trnlfspr.at            | 0.195      | 5031.204  |
| trnlfspr.cg            | 0.363      | 7742.739  |
| trnlfspr.gt            | 0.368      | 6796.917  |
| trnlfspr.frequencies1  | 0.33       | 3516.917  |
| trnlfspr.frequencies2  | 0.162      | 4897.295  |
| trnlfspr.frequencies3  | 0.169      | 5788.42   |
| trnlfspr.frequencies4  | 0.34       | 3713.054  |
| trnlfspr.alpha         | 0.878      | 19541.008 |
| trnli.ac               | 0.374      | 8954.925  |
| trnli.ag               | 0.773      | 5392.239  |
| trnli.at               | 0.14       | 10609.054 |
| trnli.cg               | 0.307      | 13053.479 |
| trnli.gt               | 0.466      | 8589.553  |
| trnli.frequencies1     | 0.404      | 6804.078  |
| trnli.frequencies2     | 0.146      | 7246.069  |
| trnli.frequencies3     | 0.177      | 8221.773  |
| trnli.frequencies4     | 0.273      | 6661.827  |
| trnli.alpha            | 1.908      | 19568.141 |
| trnli.pInv             | 0.206      | 22083.774 |
| ucl.d.mean             | 0.0005007  | 131.977   |
| ucl.d.stdev            | 0.824      | 158.196   |
| meanRate               | 0.0004598  | 153.86    |
| coefficientOfVariation | 1.041      | 215.152   |
| covariance             | 0.218      | 358.367   |
| 18s.treeLikelihood     | -9411.873  | 7155.312  |
| 26s.treeLikelihood     | -24135.69  | 9562.951  |
| atp1.treeLikelihood    | -6078.44   | 5318.38   |
| atpb.treeLikelihood    | -11797.583 | 9972.719  |
| matk.treeLikelihood    | -19839.109 | 2458.191  |

|                         |            |           |
|-------------------------|------------|-----------|
| matr.treeLikelihood     | -9752.734  | 6689.925  |
| mtlsu.treeLikelihood    | -11106.24  | 10505.481 |
| mtssu.treeLikelihood    | -7532.597  | 7832.335  |
| ndhf.treeLikelihood     | -32007.245 | 8672.527  |
| rbcl.treeLikelihood     | -18833.415 | 671.517   |
| trnlfspr.treeLikelihood | -12388.899 | 1420.693  |
| trnli.treeLikelihood    | -8589.954  | 1162.465  |
| speciation              | -1026.589  | 136.026   |

---

## **Angio 150**

| <b>Run</b> | <b>Burnin in million generations</b> | <b>Frequency used to summarize results from tree files in number of generations</b> |
|------------|--------------------------------------|-------------------------------------------------------------------------------------|
| 1          | 10                                   | 15,000                                                                              |
| 2          | 10                                   |                                                                                     |
| 3          | 10                                   |                                                                                     |
| 4          | 10                                   |                                                                                     |

### **Statistic of the combined four**

| <b>posterior</b>             | <b>Mean</b> | <b>ESS</b> |
|------------------------------|-------------|------------|
| posterior                    | -174300     | 682.997    |
| prior                        | -2800.756   | 152.012    |
| likelihood                   | -171500     | 4823.455   |
| treeModel.rootHeight         | 149.283     | 3306.359   |
| tmrca(All)                   | 149.283     | 3306.359   |
| tmrca(Caly_Chimo)            | 89.228      | 570.506    |
| tmrca(Canellales)            | 127.072     | 877.622    |
| tmrca(core_Lurales)          | 111.173     | 1162.431   |
| tmrca(Lurales)               | 119.905     | 264.353    |
| tmrca(Saur_Gymno)            | 50.719      | 708.064    |
| tmrca(eudicots)              | 106.408     | 168.977    |
| tmrca(root)                  | 148.489     | 1639.582   |
| tmrca(Magnoliinae)           | 115.803     | 514.17     |
| birthDeath.meanGrowthRate    | 0.02665     | 853.242    |
| birthDeath.relativeDeathRate | 0.362       | 8530.158   |
| birthDeath.sampleProbability | 0.556       | 1499.282   |
| 18s.ac                       | 0.186       | 16942.54   |
| 18s.ag                       | 0.346       | 10136.766  |
| 18s.at                       | 0.213       | 17613.79   |
| 18s.cg                       | 0.104       | 17848.406  |
| 18s.gt                       | 0.141       | 17797.857  |
| 18s.frequencies1             | 0.242       | 10939.918  |
| 18s.frequencies2             | 0.232       | 12178.382  |
| 18s.frequencies3             | 0.267       | 12599.942  |
| 18s.frequencies4             | 0.26        | 11096.299  |
| 18s.alpha                    | 0.325       | 13138.243  |
| 18s.plnv                     | 0.484       | 12983.526  |
| 26s.ac                       | 0.09262     | 12895.213  |
| 26s.ag                       | 0.385       | 7146.006   |



|                   |         |           |
|-------------------|---------|-----------|
| 26s.at            | 0.187   | 17120.31  |
| 26s.cg            | 0.05946 | 14689.813 |
| 26s.gt            | 0.127   | 18538.427 |
| 26s.frequencies1  | 0.263   | 8075.128  |
| 26s.frequencies2  | 0.236   | 9107.128  |
| 26s.frequencies3  | 0.309   | 10810.091 |
| 26s.frequencies4  | 0.192   | 7293.158  |
| 26s.alpha         | 0.602   | 6922.691  |
| 26s.plnv          | 0.215   | 6769.187  |
| atp1.ac           | 0.758   | 14327.888 |
| atp1.ag           | 0.813   | 9742.76   |
| atp1.at           | 0.776   | 13222.555 |
| atp1.cg           | 0.3     | 15978.948 |
| atp1.gt           | 0.388   | 13503.537 |
| atp1.frequencies1 | 0.28    | 10989.012 |
| atp1.frequencies2 | 0.206   | 12289.039 |
| atp1.frequencies3 | 0.244   | 13609.507 |
| atp1.frequencies4 | 0.27    | 12154.304 |
| atp1.alpha        | 0.293   | 10060.897 |
| atp1.plnv         | 0.415   | 10108.371 |
| atpb.ac           | 0.233   | 16443.259 |
| atpb.ag           | 0.796   | 10239.165 |
| atpb.at           | 0.07541 | 20142.706 |
| atpb.cg           | 0.147   | 21796.634 |
| atpb.gt           | 0.122   | 18584.199 |
| atpb.frequencies1 | 0.293   | 10623.655 |
| atpb.frequencies2 | 0.203   | 10845.008 |
| atpb.frequencies3 | 0.235   | 10447.345 |
| atpb.frequencies4 | 0.27    | 11732.629 |
| atpb.alpha        | 0.505   | 5364.669  |
| atpb.plnv         | 0.31    | 5399.127  |
| matk.ac           | 0.455   | 5726.134  |
| matk.ag           | 1.051   | 4236.756  |
| matk.at           | 0.06822 | 13689.313 |
| matk.cg           | 0.307   | 8692.895  |
| matk.gt           | 0.309   | 8048.397  |
| matk.frequencies1 | 0.29    | 5024.534  |
| matk.frequencies2 | 0.151   | 8028.852  |
| matk.frequencies3 | 0.153   | 5636.997  |
| matk.frequencies4 | 0.406   | 4202.062  |
| matk.alpha        | 1.149   | 10319.859 |
| matk.plnv         | 0.136   | 10158.54  |
| matr.ac           | 0.959   | 12012.41  |
| matr.ag           | 0.629   | 8951.223  |
| matr.at           | 0.724   | 14313.73  |
| matr.cg           | 0.249   | 13068.392 |
| matr.gt           | 0.839   | 11249.753 |
| matr.frequencies1 | 0.263   | 11606.123 |
| matr.frequencies2 | 0.266   | 12206.509 |
| matr.frequencies3 | 0.254   | 12525.417 |

|                    |         |           |
|--------------------|---------|-----------|
| matr.frequencies4  | 0.217   | 11434.521 |
| matr.alpha         | 0.354   | 12645.932 |
| matr.plnv          | 0.09559 | 11956.936 |
| mtlsu.ac           | 1.248   | 11450.194 |
| mtlsu.ag           | 0.625   | 8320.103  |
| mtlsu.at           | 0.862   | 10635.091 |
| mtlsu.cg           | 0.476   | 11536.703 |
| mtlsu.gt           | 1.04    | 9927.946  |
| mtlsu.frequencies1 | 0.259   | 12772.806 |
| mtlsu.frequencies2 | 0.232   | 13086.524 |
| mtlsu.frequencies3 | 0.284   | 13236.828 |
| mtlsu.frequencies4 | 0.225   | 13254.639 |
| mtlsu.alpha        | 0.291   | 23116.323 |
| mtlsu.plnv         | 0.465   | 24179.817 |
| mtssu.ac           | 0.798   | 8280.527  |
| mtssu.ag           | 0.437   | 6998.592  |
| mtssu.at           | 0.629   | 9118.586  |
| mtssu.cg           | 0.291   | 11863.698 |
| mtssu.gt           | 0.882   | 9432.42   |
| mtssu.frequencies1 | 0.252   | 13490.278 |
| mtssu.frequencies2 | 0.232   | 12917.804 |
| mtssu.frequencies3 | 0.308   | 12589.284 |
| mtssu.frequencies4 | 0.207   | 13137.869 |
| mtssu.alpha        | 0.292   | 16078.665 |
| mtssu.plnv         | 0.42    | 16118.395 |
| ndhf.ac            | 0.367   | 8512.226  |
| ndhf.ag            | 1.228   | 4662.361  |
| ndhf.at            | 0.09267 | 10821.754 |
| ndhf.cg            | 0.434   | 10866.871 |
| ndhf.gt            | 0.27    | 8800.669  |
| ndhf.frequencies1  | 0.301   | 5240.343  |
| ndhf.frequencies2  | 0.152   | 6713.041  |
| ndhf.frequencies3  | 0.143   | 6250.713  |
| ndhf.frequencies4  | 0.404   | 4873.839  |
| ndhf.alpha         | 0.834   | 7590.262  |
| ndhf.plnv          | 0.332   | 7409.446  |
| rbcl.ac            | 0.363   | 7415.9    |
| rbcl.ag            | 0.797   | 4211.835  |
| rbcl.at            | 0.124   | 7667.605  |
| rbcl.cg            | 0.27    | 9730.464  |
| rbcl.gt            | 0.211   | 6801.567  |
| rbcl.frequencies1  | 0.28    | 5764.663  |
| rbcl.frequencies2  | 0.182   | 5772.387  |
| rbcl.frequencies3  | 0.236   | 6218.225  |
| rbcl.frequencies4  | 0.302   | 6263.654  |
| rbcl.alpha         | 0.61    | 16060.506 |
| rbcl.plnv          | 0.442   | 15909.036 |
| trnlfspr.ac        | 0.459   | 4136.467  |
| trnlfspr.ag        | 0.847   | 2887.253  |
| trnlfspr.at        | 0.195   | 4915.198  |

|                         |            |           |
|-------------------------|------------|-----------|
| trnlfspr.cg             | 0.364      | 6862.053  |
| trnlfspr.gt             | 0.368      | 6314.997  |
| trnlfspr.frequencies1   | 0.329      | 3322.526  |
| trnlfspr.frequencies2   | 0.162      | 4990.031  |
| trnlfspr.frequencies3   | 0.169      | 5667.095  |
| trnlfspr.frequencies4   | 0.341      | 3471.615  |
| trnlfspr.alpha          | 0.877      | 20733.962 |
| trnli.ac                | 0.375      | 8288.722  |
| trnli.ag                | 0.773      | 5175.462  |
| trnli.at                | 0.14       | 10708.764 |
| trnli.cg                | 0.307      | 11559.418 |
| trnli.gt                | 0.466      | 8601.828  |
| trnli.frequencies1      | 0.404      | 6173.652  |
| trnli.frequencies2      | 0.146      | 7532.593  |
| trnli.frequencies3      | 0.177      | 7626.883  |
| trnli.frequencies4      | 0.273      | 6138.13   |
| trnli.alpha             | 1.914      | 19251.415 |
| trnli.pln               | 0.207      | 21267.931 |
| ucl.d.mean              | 0.0004697  | 138.037   |
| ucl.d.stdev             | 0.748      | 247.498   |
| meanRate                | 0.0004506  | 165.706   |
| coefficientOfVariation  | 0.876      | 238.658   |
| covariance              | 0.165      | 440.809   |
| 18s.treeLikelihood      | -9411.912  | 3148.83   |
| 26s.treeLikelihood      | -24136.239 | 7144.017  |
| atp1.treeLikelihood     | -6078.563  | 7602.37   |
| atpb.treeLikelihood     | -11797.425 | 8658.379  |
| matk.treeLikelihood     | -19839.34  | 2370.236  |
| matr.treeLikelihood     | -9752.753  | 4391.17   |
| mtlsu.treeLikelihood    | -11106.334 | 12501.091 |
| mtssu.treeLikelihood    | -7532.641  | 10010.464 |
| ndhf.treeLikelihood     | -32007.166 | 9197.638  |
| rbcl.treeLikelihood     | -18831.815 | 450.389   |
| trnlfspr.treeLikelihood | -12388.332 | 1240.787  |
| trnli.treeLikelihood    | -8589.546  | 1448.395  |
| speciation              | -1031.223  | 146.006   |

---

## **Angio 170**

| <b>Run</b>                                 | <b>Burnin in million generations</b> | <b>Frequency used to summarize results from tree files in number of generations</b> |
|--------------------------------------------|--------------------------------------|-------------------------------------------------------------------------------------|
| 1                                          | 10                                   | 15,000                                                                              |
| 2                                          | 10                                   |                                                                                     |
| 3                                          | 15                                   |                                                                                     |
| 4                                          | 15                                   |                                                                                     |
| <b>Statistic of the combined four runs</b> |                                      |                                                                                     |
| posterior                                  | <b>Mean</b><br>-174300               | <b>ESS</b><br>724.88                                                                |

|                              |           |           |
|------------------------------|-----------|-----------|
| prior                        | -2810.944 | 174.565   |
| likelihood                   | -171500   | 5852.575  |
| treeModel.rootHeight         | 168.321   | 1878.826  |
| tmrca(All)                   | 168.321   | 1878.826  |
| tmrca(Caly_Chimo)            | 89.142    | 786.058   |
| tmrca(Canellales)            | 128.84    | 505.002   |
| tmrca(core_Laurales)         | 112.509   | 1180.179  |
| tmrca(Laurales)              | 123.955   | 345.616   |
| tmrca(Saur_Gymno)            | 51.539    | 568.131   |
| tmrca(eudicots)              | 110.839   | 195.43    |
| tmrca(root)                  | 166.649   | 964.665   |
| tmrca(Magnoliinae)           | 117.695   | 422.452   |
| birthDeath.meanGrowthRate    | 0.02504   | 980.499   |
| birthDeath.relativeDeathRate | 0.367     | 9693.7    |
| birthDeath.sampleProbability | 0.569     | 1749.104  |
| 18s.ac                       | 0.186     | 16339.116 |
| 18s.ag                       | 0.346     | 9916.702  |
| 18s.at                       | 0.213     | 17210.68  |
| 18s.cg                       | 0.105     | 16214.675 |
| 18s.gt                       | 0.141     | 16444.484 |
| 18s.frequencies1             | 0.242     | 10965.085 |
| 18s.frequencies2             | 0.232     | 11345.615 |
| 18s.frequencies3             | 0.266     | 11544.862 |
| 18s.frequencies4             | 0.26      | 9860.608  |
| 18s.alpha                    | 0.324     | 12960.797 |
| 18s.plnv                     | 0.483     | 12729.293 |
| 26s.ac                       | 0.09242   | 11264.249 |
| 26s.ag                       | 0.385     | 6712.361  |
| 26s.at                       | 0.186     | 15815.169 |
| 26s.cg                       | 0.05936   | 12956.079 |
| 26s.gt                       | 0.127     | 19097.949 |
| 26s.frequencies1             | 0.263     | 6691.715  |
| 26s.frequencies2             | 0.236     | 9494.939  |
| 26s.frequencies3             | 0.309     | 9912.96   |
| 26s.frequencies4             | 0.192     | 6605.991  |
| 26s.alpha                    | 0.603     | 7129.751  |
| 26s.plnv                     | 0.216     | 6967.256  |
| atp1.ac                      | 0.76      | 14773.329 |
| atp1.ag                      | 0.817     | 9406.458  |
| atp1.at                      | 0.778     | 12952.856 |
| atp1.cg                      | 0.301     | 15109.508 |
| atp1.gt                      | 0.389     | 12668.808 |
| atp1.frequencies1            | 0.28      | 10729.37  |
| atp1.frequencies2            | 0.206     | 11867.609 |
| atp1.frequencies3            | 0.244     | 12605.621 |
| atp1.frequencies4            | 0.27      | 12173.674 |
| atp1.alpha                   | 0.294     | 9799.75   |
| atp1.plnv                    | 0.417     | 9778.589  |
| atpb.ac                      | 0.233     | 16019.81  |
| atpb.ag                      | 0.796     | 10422.588 |

|                    |         |           |
|--------------------|---------|-----------|
| atpb.at            | 0.07542 | 20811.196 |
| atpb.cg            | 0.147   | 20691.305 |
| atpb.gt            | 0.122   | 17872.524 |
| atpb.frequencies1  | 0.292   | 11486.716 |
| atpb.frequencies2  | 0.203   | 11616.255 |
| atpb.frequencies3  | 0.235   | 11756.257 |
| atpb.frequencies4  | 0.27    | 11153.23  |
| atpb.alpha         | 0.504   | 5231.494  |
| atpb.plnv          | 0.309   | 5262.427  |
| matk.ac            | 0.456   | 6000.097  |
| matk.ag            | 1.053   | 4176.667  |
| matk.at            | 0.06834 | 12291.522 |
| matk.cg            | 0.307   | 8219.317  |
| matk.gt            | 0.309   | 8278.8    |
| matk.frequencies1  | 0.29    | 4649.116  |
| matk.frequencies2  | 0.151   | 7307.245  |
| matk.frequencies3  | 0.153   | 5030.989  |
| matk.frequencies4  | 0.406   | 4213.758  |
| matk.alpha         | 1.15    | 10090.337 |
| matk.plnv          | 0.136   | 9974.556  |
| matr.ac            | 0.958   | 10935.233 |
| matr.ag            | 0.627   | 8442.96   |
| matr.at            | 0.722   | 12597.033 |
| matr.cg            | 0.248   | 12925.977 |
| matr.gt            | 0.837   | 10945.231 |
| matr.frequencies1  | 0.263   | 10841.104 |
| matr.frequencies2  | 0.266   | 11603.662 |
| matr.frequencies3  | 0.254   | 11927.649 |
| matr.frequencies4  | 0.217   | 10497.94  |
| matr.alpha         | 0.354   | 10651.629 |
| matr.plnv          | 0.09543 | 10955.546 |
| mtlsu.ac           | 1.249   | 11889.897 |
| mtlsu.ag           | 0.626   | 8695.859  |
| mtlsu.at           | 0.863   | 11203.223 |
| mtlsu.cg           | 0.476   | 11856.649 |
| mtlsu.gt           | 1.042   | 9915.562  |
| mtlsu.frequencies1 | 0.259   | 12554.131 |
| mtlsu.frequencies2 | 0.232   | 12105.016 |
| mtlsu.frequencies3 | 0.284   | 10547.357 |
| mtlsu.frequencies4 | 0.225   | 12447.716 |
| mtlsu.alpha        | 0.291   | 21143.691 |
| mtlsu.plnv         | 0.465   | 21298.303 |
| mtssu.ac           | 0.8     | 10551.131 |
| mtssu.ag           | 0.438   | 8496.86   |
| mtssu.at           | 0.629   | 11352.822 |
| mtssu.cg           | 0.291   | 12925.67  |
| mtssu.gt           | 0.881   | 11301.292 |
| mtssu.frequencies1 | 0.252   | 12115.264 |
| mtssu.frequencies2 | 0.233   | 12736.512 |
| mtssu.frequencies3 | 0.308   | 13278.014 |

|                        |           |           |
|------------------------|-----------|-----------|
| mtssu.frequencies4     | 0.208     | 12709.773 |
| mtssu.alpha            | 0.293     | 13787.216 |
| mtssu.plnv             | 0.421     | 14394.395 |
| ndhf.ac                | 0.366     | 8535.744  |
| ndhf.ag                | 1.225     | 4413.946  |
| ndhf.at                | 0.09268   | 9574.651  |
| ndhf.cg                | 0.433     | 11370.655 |
| ndhf.gt                | 0.27      | 8181.531  |
| ndhf.frequencies1      | 0.301     | 5024.786  |
| ndhf.frequencies2      | 0.152     | 6649.782  |
| ndhf.frequencies3      | 0.143     | 6160.654  |
| ndhf.frequencies4      | 0.404     | 5184.459  |
| ndhf.alpha             | 0.835     | 7055.637  |
| ndhf.plnv              | 0.332     | 6902.576  |
| rbcl.ac                | 0.365     | 8507.889  |
| rbcl.ag                | 0.798     | 4439.611  |
| rbcl.at                | 0.123     | 8310.201  |
| rbcl.cg                | 0.271     | 11199.704 |
| rbcl.gt                | 0.211     | 7595.08   |
| rbcl.frequencies1      | 0.28      | 5960.237  |
| rbcl.frequencies2      | 0.182     | 5103.988  |
| rbcl.frequencies3      | 0.236     | 7080.863  |
| rbcl.frequencies4      | 0.303     | 6758.719  |
| rbcl.alpha             | 0.611     | 17993.693 |
| rbcl.plnv              | 0.443     | 17135.374 |
| trnlfspr.ac            | 0.459     | 4109.11   |
| trnlfspr.ag            | 0.847     | 2718.81   |
| trnlfspr.at            | 0.195     | 3442.304  |
| trnlfspr.cg            | 0.364     | 7095.45   |
| trnlfspr.gt            | 0.368     | 5607.633  |
| trnlfspr.frequencies1  | 0.329     | 3310.008  |
| trnlfspr.frequencies2  | 0.162     | 3919.011  |
| trnlfspr.frequencies3  | 0.169     | 5491.239  |
| trnlfspr.frequencies4  | 0.34      | 3145.69   |
| trnlfspr.alpha         | 0.877     | 18871.435 |
| trnli.ac               | 0.374     | 8861.113  |
| trnli.ag               | 0.771     | 5457.21   |
| trnli.at               | 0.14      | 11275.275 |
| trnli.cg               | 0.307     | 11261.381 |
| trnli.gt               | 0.465     | 8336.783  |
| trnli.frequencies1     | 0.404     | 6797.377  |
| trnli.frequencies2     | 0.146     | 8077.475  |
| trnli.frequencies3     | 0.178     | 6855.91   |
| trnli.frequencies4     | 0.272     | 6464.388  |
| trnli.alpha            | 1.908     | 19711.417 |
| trnli.plnv             | 0.206     | 21426.191 |
| uclid.mean             | 0.0004312 | 170.511   |
| uclid.stdev            | 0.695     | 217.171   |
| meanRate               | 0.00043   | 190.445   |
| coefficientOfVariation | 0.786     | 198.818   |

|                         |            |           |
|-------------------------|------------|-----------|
| covariance              | 0.116      | 404.965   |
| 18s.treeLikelihood      | -9411.963  | 8621.072  |
| 26s.treeLikelihood      | -24137.081 | 8372.297  |
| atp1.treeLikelihood     | -6078.371  | 4327.734  |
| atpb.treeLikelihood     | -11797.291 | 6580.839  |
| matk.treeLikelihood     | -19837.549 | 2497.778  |
| matr.treeLikelihood     | -9753.167  | 9017.865  |
| mtlsu.treeLikelihood    | -11106.295 | 10570.491 |
| mtssu.treeLikelihood    | -7532.67   | 3584.558  |
| ndhf.treeLikelihood     | -32007.744 | 9360.257  |
| rbcl.treeLikelihood     | -18835.464 | 585.929   |
| trnlfspr.treeLikelihood | -12387.214 | 1171.63   |
| trnli.treeLikelihood    | -8588.15   | 1527.602  |
| speciation              | -1041.449  | 168.44    |

---

## **Angio 200**

| <b>Run</b> | <b>Burnin in million generations</b> | <b>Frequency used to summarize results from tree files in number of generations</b> |
|------------|--------------------------------------|-------------------------------------------------------------------------------------|
| 1          | 10                                   | 15,000                                                                              |
| 2          | 10                                   |                                                                                     |
| 3          | 10                                   |                                                                                     |
| 4          | 10                                   |                                                                                     |

### **Statistic of the combined four runs**

|                              | <b>Mean</b> | <b>ESS</b> |
|------------------------------|-------------|------------|
| posterior                    | -174300     | 1072.256   |
| prior                        | -2827.13    | 244.696    |
| likelihood                   | -171500     | 10662.375  |
| treeModel.rootHeight         | 196.25      | 1263.293   |
| tmrca(All)                   | 196.25      | 1263.293   |
| tmrca(Caly_Chimo)            | 89.639      | 851.913    |
| tmrca(Canellales)            | 132.426     | 389.164    |
| tmrca(core_Laurales)         | 114.755     | 723.94     |
| tmrca(Laurales)              | 131.116     | 351.532    |
| tmrca(Saur_Gymno)            | 52.248      | 811.569    |
| tmrca(eudicots)              | 116.137     | 308.126    |
| tmrca(root)                  | 192.834     | 619.204    |
| tmrca(Magnoliinae)           | 122.457     | 236.257    |
| birthDeath.meanGrowthRate    | 0.02298     | 1164.317   |
| birthDeath.relativeDeathRate | 0.37        | 10959.131  |
| birthDeath.sampleProbability | 0.58        | 2326.192   |
| 18s.ac                       | 0.187       | 17134.978  |
| 18s.ag                       | 0.348       | 11315.475  |
| 18s.at                       | 0.213       | 18103.518  |
| 18s.cg                       | 0.105       | 18196.765  |
| 18s.gt                       | 0.141       | 16971.027  |
| 18s.frequencies1             | 0.242       | 11368.171  |
| 18s.frequencies2             | 0.232       | 12286.947  |

|                   |         |           |
|-------------------|---------|-----------|
| 18s.frequencies3  | 0.266   | 12400.481 |
| 18s.frequencies4  | 0.26    | 11116.226 |
| 18s.alpha         | 0.324   | 13073.953 |
| 18s.plnv          | 0.484   | 12834.211 |
| 26s.ac            | 0.09261 | 12071.025 |
| 26s.ag            | 0.385   | 7363.637  |
| 26s.at            | 0.187   | 17627.321 |
| 26s.cg            | 0.05937 | 14343.082 |
| 26s.gt            | 0.127   | 21621.147 |
| 26s.frequencies1  | 0.263   | 7894.137  |
| 26s.frequencies2  | 0.236   | 10976.429 |
| 26s.frequencies3  | 0.309   | 11106.572 |
| 26s.frequencies4  | 0.192   | 7374.31   |
| 26s.alpha         | 0.601   | 6125.38   |
| 26s.plnv          | 0.215   | 5873.809  |
| atp1.ac           | 0.76    | 15678.463 |
| atp1.ag           | 0.816   | 9954.818  |
| atp1.at           | 0.777   | 13500.64  |
| atp1.cg           | 0.301   | 16814.159 |
| atp1.gt           | 0.389   | 13847.352 |
| atp1.frequencies1 | 0.28    | 11338.293 |
| atp1.frequencies2 | 0.206   | 12302.184 |
| atp1.frequencies3 | 0.243   | 13919.953 |
| atp1.frequencies4 | 0.27    | 12722.663 |
| atp1.alpha        | 0.294   | 8864.896  |
| atp1.plnv         | 0.416   | 9529.207  |
| atpb.ac           | 0.233   | 16226.384 |
| atpb.ag           | 0.795   | 10028.998 |
| atpb.at           | 0.07539 | 21544.148 |
| atpb.cg           | 0.147   | 20421.054 |
| atpb.gt           | 0.122   | 18658.263 |
| atpb.frequencies1 | 0.293   | 11078.262 |
| atpb.frequencies2 | 0.203   | 11912.395 |
| atpb.frequencies3 | 0.235   | 12052.689 |
| atpb.frequencies4 | 0.27    | 11668.311 |
| atpb.alpha        | 0.503   | 5675.101  |
| atpb.plnv         | 0.309   | 5691.378  |
| matk.ac           | 0.456   | 5544.303  |
| matk.ag           | 1.052   | 3949.181  |
| matk.at           | 0.06832 | 10324.045 |
| matk.cg           | 0.307   | 8859.259  |
| matk.gt           | 0.309   | 8197.883  |
| matk.frequencies1 | 0.29    | 4400.147  |
| matk.frequencies2 | 0.151   | 7725.371  |
| matk.frequencies3 | 0.153   | 6006.871  |
| matk.frequencies4 | 0.406   | 4118.561  |
| matk.alpha        | 1.148   | 10987.022 |
| matk.plnv         | 0.136   | 10682.94  |
| matr.ac           | 0.958   | 11443.278 |
| matr.ag           | 0.627   | 8682.954  |



|                    |         |           |
|--------------------|---------|-----------|
| matr.at            | 0.723   | 13847.739 |
| matr.cg            | 0.248   | 13184.272 |
| matr.gt            | 0.838   | 11617.031 |
| matr.frequencies1  | 0.263   | 11489.369 |
| matr.frequencies2  | 0.266   | 12827.034 |
| matr.frequencies3  | 0.254   | 12425.73  |
| matr.frequencies4  | 0.217   | 10928.844 |
| matr.alpha         | 0.354   | 11095.054 |
| matr.plnv          | 0.09558 | 10565.062 |
| mtlsu.ac           | 1.244   | 11829.496 |
| mtlsu.ag           | 0.622   | 8850.613  |
| mtlsu.at           | 0.861   | 12157.436 |
| mtlsu.cg           | 0.474   | 11808.768 |
| mtlsu.gt           | 1.037   | 10295.182 |
| mtlsu.frequencies1 | 0.259   | 12482.191 |
| mtlsu.frequencies2 | 0.232   | 13181.878 |
| mtlsu.frequencies3 | 0.284   | 12158.581 |
| mtlsu.frequencies4 | 0.225   | 11875.223 |
| mtlsu.alpha        | 0.291   | 21315.46  |
| mtlsu.plnv         | 0.465   | 22081.134 |
| mtssu.ac           | 0.8     | 10053.385 |
| mtssu.ag           | 0.439   | 7700.097  |
| mtssu.at           | 0.63    | 10468.876 |
| mtssu.cg           | 0.291   | 12072.275 |
| mtssu.gt           | 0.885   | 10189.333 |
| mtssu.frequencies1 | 0.252   | 11475.067 |
| mtssu.frequencies2 | 0.233   | 12085.22  |
| mtssu.frequencies3 | 0.308   | 11164.33  |
| mtssu.frequencies4 | 0.208   | 11085.854 |
| mtssu.alpha        | 0.292   | 15290.854 |
| mtssu.plnv         | 0.421   | 15005.494 |
| ndhf.ac            | 0.366   | 10026.956 |
| ndhf.ag            | 1.224   | 4718.419  |
| ndhf.at            | 0.09253 | 11200.09  |
| ndhf.cg            | 0.434   | 11503.177 |
| ndhf.gt            | 0.27    | 8815.829  |
| ndhf.frequencies1  | 0.302   | 5996.79   |
| ndhf.frequencies2  | 0.152   | 6927.982  |
| ndhf.frequencies3  | 0.143   | 6207.812  |
| ndhf.frequencies4  | 0.404   | 5813.32   |
| ndhf.alpha         | 0.833   | 6691.614  |
| ndhf.plnv          | 0.331   | 6229.654  |
| rbcl.ac            | 0.364   | 8674.588  |
| rbcl.ag            | 0.802   | 4523.041  |
| rbcl.at            | 0.124   | 9323.777  |
| rbcl.cg            | 0.271   | 10412.757 |
| rbcl.gt            | 0.213   | 7356.128  |
| rbcl.frequencies1  | 0.28    | 6610.219  |
| rbcl.frequencies2  | 0.183   | 6288.084  |
| rbcl.frequencies3  | 0.235   | 6428.955  |

|                         |            |           |
|-------------------------|------------|-----------|
| rbcl.frequencies4       | 0.302      | 6692.088  |
| rbcl.alpha              | 0.612      | 17277.89  |
| rbcl.pInv               | 0.442      | 16939.11  |
| trnlfspr.ac             | 0.457      | 4254.12   |
| trnlfspr.ag             | 0.842      | 2033.363  |
| trnlfspr.at             | 0.195      | 3264.406  |
| trnlfspr.cg             | 0.363      | 6416.873  |
| trnlfspr.gt             | 0.368      | 5053.178  |
| trnlfspr.frequencies1   | 0.33       | 2544.266  |
| trnlfspr.frequencies2   | 0.162      | 3916.033  |
| trnlfspr.frequencies3   | 0.169      | 4808.771  |
| trnlfspr.frequencies4   | 0.34       | 3512.899  |
| trnlfspr.alpha          | 0.876      | 21662.105 |
| trnli.ac                | 0.374      | 8927.874  |
| trnli.ag                | 0.771      | 5553.63   |
| trnli.at                | 0.14       | 11221.426 |
| trnli.cg                | 0.307      | 11960.598 |
| trnli.gt                | 0.465      | 8857.653  |
| trnli.frequencies1      | 0.405      | 6559.955  |
| trnli.frequencies2      | 0.146      | 7636.452  |
| trnli.frequencies3      | 0.178      | 7140.339  |
| trnli.frequencies4      | 0.272      | 6204.307  |
| trnli.alpha             | 1.91       | 19096.588 |
| trnli.pInv              | 0.207      | 19304.541 |
| uclid.mean              | 0.0004007  | 198.642   |
| uclid.stdev             | 0.677      | 231.355   |
| meanRate                | 0.0003995  | 262.022   |
| coefficientOfVariation  | 0.74       | 266.886   |
| covariance              | 0.09617    | 393.231   |
| 18s.treeLikelihood      | -9411.327  | 7954.215  |
| 26s.treeLikelihood      | -24137.495 | 9824.141  |
| atp1.treeLikelihood     | -6077.993  | 6580.656  |
| atpb.treeLikelihood     | -11797.017 | 10871.194 |
| matk.treeLikelihood     | -19838.952 | 2728.554  |
| matr.treeLikelihood     | -9753.026  | 7063.446  |
| mtlsu.treeLikelihood    | -11106.292 | 7546.342  |
| mtssu.treeLikelihood    | -7532.69   | 10590.07  |
| ndhf.treeLikelihood     | -32008.545 | 9489.979  |
| rbcl.treeLikelihood     | -18831.121 | 642.502   |
| trnlfspr.treeLikelihood | -12388.804 | 1275.412  |
| trnli.treeLikelihood    | -8588.839  | 1723.789  |
| speciation              | -1057.529  | 236.882   |
